# Supplementary material for: Cobalt Kβ valence-to-core X-ray emission spectroscopy: a study of low-spin octahedral cobalt(iii) complexes
Source: Royal Society of Chemistry journal article supplement (doi:10.1039/c6dt02413k), 2016-01-01
Supplement: c6dt02413k1.pdf [file c6dt02413k1.pdf]

**Supporting Information:**

Cobalt  $K\beta$  Valence-to-Core X-ray Emission Spectroscopy: A Study of Low-Spin Octahedral

Cobalt(III) Complexes

*Katarina Schwalenstocker,<sup>a</sup> Jaya Paudel,<sup>a</sup> Alexander W. Kohn,<sup>b</sup> Chao Dong,<sup>a</sup>*

*Katherine M. Van Heuvelen,<sup>\*b</sup> Erik R. Farquhar,<sup>\*c</sup> Feifei Li,<sup>\*a</sup>*

<sup>a</sup> Department of Chemistry and Biochemistry, New Mexico State University, Las Cruces NM 88003

<sup>b</sup> Department of Chemistry, Harvey Mudd College, Claremont, CA 91771

<sup>c</sup> CWRU Center for Synchrotron Biosciences, Brookhaven National Laboratory, Upton, NY 11973

## Table of Contents

|                                                                                                                                                                                                                                                  |      |
|--------------------------------------------------------------------------------------------------------------------------------------------------------------------------------------------------------------------------------------------------|------|
| <b>Preparation and Characterization of Complexes</b> .....                                                                                                                                                                                       | S-4  |
| <b>Figure S1:</b> Cobalt $K\beta$ V2C X-ray Emission Spectra of $[\text{Co}^{\text{III}}(\text{NH}_3)_6]\text{Cl}_3$ , $[\text{Co}^{\text{III}}(\text{acac})_3]$ , and $[\text{Co}^{\text{III}}(\text{dmgH})(\text{dmgH}_2)(\text{Cl})_2]$ ..... | S-6  |
| <b>Figure S2:</b> Correlation of Calculated vs. Experimental V2C energies.....                                                                                                                                                                   | S-7  |
| <b>Figure S3:</b> Correlation of Calculated vs. Experimental V2C Areas .....                                                                                                                                                                     | S-7  |
| <b>Table S1:</b> Details of V2C XES Curve-Fitting Results for Complexes <b>1-10</b> .....                                                                                                                                                        | S-8  |
| <b>Figure S4:</b> Calculated Cobalt $K\beta$ V2C X-ray Emission Spectra of $[\text{Co}^{\text{III}}(\text{NH}_3)_6]\text{Cl}_3$ ( <b>1</b> ) and Molecular Orbitals.....                                                                         | S-10 |
| <b>Figure S5:</b> Calculated Cobalt $K\beta$ V2C X-ray Emission Spectra of $[\text{Co}^{\text{III}}(\text{acac})_3]$ ( <b>5</b> ) and Molecular Orbitals.....                                                                                    | S-10 |
| <b>Table S2:</b> Molecular Orbital Löwdin Population Analysis for $[\text{Co}^{\text{III}}(\text{NH}_3)_6]\text{Cl}_3$ ( <b>1</b> ).....                                                                                                         | S-11 |
| <b>Table S3:</b> Experimental vs DFT-Calculated Spectra of $[\text{Co}^{\text{III}}(\text{NH}_3)_6]\text{Cl}_3$ ( <b>1</b> ).....                                                                                                                | S-11 |
| <b>Table S4:</b> Molecular Orbital Löwdin Population Analysis for $[\text{Co}^{\text{III}}(\text{acac})_3]$ ( <b>5</b> ).....                                                                                                                    | S-12 |
| <b>Table S5:</b> MO Löwdin Population Analysis for $[\text{Co}^{\text{III}}(\text{dmgH})(\text{dmgH}_2)\text{Cl}_2]$ ( <b>6</b> ).....                                                                                                           | S-12 |
| <b>Table S6:</b> MOs that have >20% Löwdin Population from the Dichloro Ligands <i>and</i> Contribute Significantly to the X-ray Emission Spectra of $[\text{Co}^{\text{III}}(\text{dmgH})(\text{dmgH}_2)(\text{Cl})_2]$ ( <b>6</b> ).....       | S-13 |
| <b>Table S7:</b> MOs that have >20% Löwdin Population from the Dipyridine Ligands <i>and</i> Contribute Significantly to the X-ray Emission Spectra of $[\text{Co}^{\text{III}}(\text{dmgH})_2(\text{py})_2](\text{NO}_3)$ ( <b>8</b> ).....     | S-13 |
| <b>Figure S6:</b> Experimental Cobalt $K\beta$ X-ray Emission Spectra of Complexes <b>1 – 4</b> .....                                                                                                                                            | S-14 |
| <b>Figure S7:</b> Experimental Cobalt $K\beta$ X-ray Emission Spectra of Complexes <b>9 and 10</b> .....                                                                                                                                         | S-14 |
| <b>Figure S8:</b> Qualitative Molecular Orbitals for Octahedral $\text{ML}_6$ Complexes.....                                                                                                                                                     | S-15 |
| <b>Figure S9:</b> Calculated cobalt $K\beta$ V2C X-ray Emission Spectra of Hypothetical Low-spin $[\text{Co}^{\text{III}}\text{F}_6]^{3-}$ and Key Molecular Orbitals.....                                                                       | S-15 |
| <b>Sample Gaussian Geometry Optimization Input File</b> .....                                                                                                                                                                                    | S-16 |
| <b>Sample ORCA XES Calculation Input File</b> .....                                                                                                                                                                                              | S-17 |
| <b>Optimized xyz coordinates for <math>[\text{Co}^{\text{III}}(\text{NH}_3)_6]^{3+}</math></b> .....                                                                                                                                             | S-18 |
| <b>Reoriented xyz coordinates for <math>[\text{Co}^{\text{III}}(\text{NH}_3)_6]^{3+}</math> based on a crystal structure</b> .....                                                                                                               | S-19 |
| <b>Optimized xyz coordinates for <math>[\text{Co}^{\text{III}}(\text{NH}_3)_5\text{Cl}]^{2+}</math></b> .....                                                                                                                                    | S-20 |
| <b>Optimized xyz coordinates for <math>[\text{Co}^{\text{III}}(\text{NH}_3)_4(\text{CO}_3)]^+</math></b> .....                                                                                                                                   | S-21 |
| <b>Optimized xyz coordinates for <math>[\text{Co}^{\text{III}}(\text{en})_3]^{3+}</math></b> .....                                                                                                                                               | S-22 |

|                                                                                                            |      |
|------------------------------------------------------------------------------------------------------------|------|
| Optimized xyz coordinates for [Co <sup>III</sup> (acac) <sub>3</sub> ]                                     | S-24 |
| Reoriented xyz coordinates for [Co <sup>III</sup> (acac) <sub>3</sub> ] based on a crystal structure       | S-26 |
| Optimized xyz coordinates for [Co <sup>III</sup> (dmgH)(dmgH <sub>2</sub> )(Cl) <sub>2</sub> ]             | S-28 |
| Optimized xyz coordinates for [Co <sup>III</sup> (dmgH) <sub>2</sub> (Cl)(py)]                             | S-30 |
| Optimized xyz coordinates for [Co <sup>III</sup> (dmgH) <sub>2</sub> (py) <sub>2</sub> ] <sup>+</sup>      | S-32 |
| Optimized xyz coordinates for [Co <sup>III</sup> (dmgH) <sub>2</sub> ( <sup>i</sup> Pr)(py)]               | S-34 |
| Optimized xyz coordinates for [Co <sup>III</sup> (dmgH) <sub>2</sub> ( <i>cis</i> -1,2-dichlorovinyl)(py)] | S-36 |
| Optimized xyz coordinates for [Co <sup>III</sup> (CN) <sub>6</sub> ] <sup>3-</sup>                         | S-38 |
| Optimized xyz coordinates for [Co <sup>III</sup> (ox) <sub>3</sub> ] <sup>3-</sup>                         | S-39 |
| Optimized xyz coordinates for low-spin [Co <sup>III</sup> F <sub>6</sub> ] <sup>3-</sup>                   | S-40 |
| Optimized xyz coordinates for low-spin [Co <sup>III</sup> (OH) <sub>6</sub> ] <sup>3-</sup>                | S-41 |
| Optimized xyz coordinates for low-spin [Co <sup>III</sup> (dte) <sub>3</sub> ]                             | S-42 |
| Optimized xyz coordinates for low-spin [Co <sup>III</sup> (SCN) <sub>6</sub> ] <sup>3-</sup>               | S-44 |
| Optimized xyz coordinates for low-spin [Co <sup>III</sup> Cl <sub>6</sub> ] <sup>3-</sup>                  | S-45 |
| References                                                                                                 | S-46 |

## Preparation and Characterization of Complexes

All reagents, including  $[\text{Co}(\text{NH}_3)_6]\text{Cl}_3$  (**1**) and  $[\text{Co}(\text{acac})_3]$  (**5**), were purchased from commercial sources such as Sigma-Aldrich and used without further purification unless otherwise noted. Elemental analyses were performed at Atlantic Microlab, Inc. Abbreviations used: acac = acetylacetonate; dmgH = dimethylgloxime monoanion;  $\text{dmgH}_2$  = neutral dimethylgloxime; en = ethane-1,2-diamine.

$[\text{Co}^{\text{III}}(\text{NH}_3)_5\text{Cl}]\text{Cl}_2$  (**2**) was synthesized according to an established procedure.<sup>1,2</sup> Anal. calcd. for  $[\text{Co}^{\text{III}}(\text{NH}_3)_5\text{Cl}]\text{Cl}_2 \cdot 0.5\text{H}_2\text{O}$  ( $\text{CoN}_5\text{H}_{16}\text{Cl}_3\text{O}_{0.5}$ ): C 0.00, H 6.22, N 26.99; found C 0.19, H 6.20, N 27.01.

$[\text{Co}^{\text{III}}(\text{NH}_3)_4\text{CO}_3]\text{NO}_3$  (**3**) was synthesized according to an established procedure.<sup>1,3</sup> Anal. calcd. for  $[\text{Co}^{\text{III}}(\text{NH}_3)_4\text{CO}_3]\text{NO}_3 \cdot 0.5\text{H}_2\text{O}$  ( $\text{CoN}_5\text{H}_{13}\text{CO}_6.5$ ): C 4.65, H 5.08, N 27.14; found C 5.04, H 4.74, N 27.24.

$[\text{Co}^{\text{III}}(\text{en})_3]\text{Cl}_3$  (**4**) was synthesized following a published procedure.<sup>1</sup> Anal. calcd. for  $[\text{Co}(\text{en})_3]\text{Cl}_3 \cdot \frac{1}{2}\text{NaCl} \cdot 3\text{H}_2\text{O}$  ( $\text{CoC}_6\text{N}_6\text{H}_{30}\text{O}_3\text{Cl}_{3.5}\text{Na}_{0.5}$ ): C 16.80 H 7.05 N 19.60; found C 17.11, H 6.83, N 19.55.

$[\text{Co}^{\text{III}}(\text{dmgH}_2)(\text{dmgH})\text{Cl}_2]$  (**6**) was made using a procedure previously described.<sup>4</sup> Anal calcd. for  $[\text{Co}^{\text{III}}(\text{dmgH}_2)(\text{dmgH})\text{Cl}_2]$  ( $\text{CoC}_8\text{H}_{15}\text{N}_4\text{O}_4\text{Cl}_2$ ): C 26.61, H 4.19, N 15.52; found C 26.74, H 4.14, N 15.51. <sup>1</sup>H NMR (300MHz, *d*<sub>6</sub>-DMSO):  $\delta$  ppm 2.34 (12H, singlet, CH<sub>3</sub>).

$[\text{Co}^{\text{III}}(\text{dmgH})_2(\text{py})\text{Cl}]$  (**7**) was synthesized using the method described by Trogler and co-workers.<sup>5</sup> Anal calcd. for  $[\text{Co}^{\text{III}}(\text{dmgH})_2(\text{py})\text{Cl}]$  ( $\text{CoC}_{13}\text{H}_{19}\text{N}_5\text{O}_4\text{Cl}$ ): C: 38.68, H: 4.74, N: 17.35; found: C: 38.70, H: 4.75, N: 17.25. <sup>1</sup>H NMR (300MHz, *d*<sub>6</sub>-DMSO):  $\delta$  ppm 2.40 (12H, singlet, CH<sub>3</sub>), 7.25 (2H, m, py), 7.70 (1H, m, py), 8.29 (2H, m, py).

Synthesis of  $[\text{Co}^{\text{III}}(\text{dmgH})_2(\text{py})_2]\text{NO}_3$  (**8**). Cobalt nitrate hexahydrate (1.18 g, 4.05 mmol) and dimethylgloxime (0.99 g, 8.53 mmol) were placed in a large test tube with a stir bar, and then dissolved with a minimum volume of boiling absolute ethanol. Pyridine (0.80 mL, 9.93 mmol) dissolved in a minimum volume of absolute ethanol was added to the reaction mixture with vigorous stirring. Heating and stirring was continued for 30 minutes. After the heat was turned off, the solution was allowed to cool while

a stream of air was bubbled into the solution for one hour. The air stream was then removed and the solution was allowed to sit at room temperatures for an additional hour while the precipitate formed. The complex was collected using vacuum filtration and washed with absolute ethanol and diethyl ether. Yield: 0.78 g (38%). Anal. calc. for  $[\text{Co}^{\text{III}}(\text{dmgH})_2(\text{py})_2]\text{NO}_3$  ( $\text{CoC}_{18}\text{H}_{24}\text{N}_7\text{O}_7$ ): C: 42.44, H: 4.75, N: 19.25; found: C: 42.37, H: 4.78, N: 19.15.  $^1\text{H}$  NMR (300 MHz,  $d_3$ -MeCN):  $\delta$  ppm 2.24 (12H, s,  $\text{CH}_3$ ), 7.40 (4H, m, py), 7.88 (2H, m, py), 8.26 (4H, m, py).

$[\text{Co}^{\text{III}}(\text{dmgH})_2(\text{iPr})(\text{py})]$  (**9**) was made using a procedure previously described.<sup>1</sup> Anal. calcd. For  $[\text{Co}^{\text{III}}(\text{dmgH})_2(\text{iPr})(\text{py})]$  ( $\text{CoC}_{16}\text{H}_{26}\text{N}_5\text{O}_4$ ): C 46.72, H 6.37, N 17.03; found: C 46.69, H 6.20, N 17.02.  $^1\text{H}$  NMR (300MHz,  $\text{CDCl}_3$ ):  $\delta$  ppm 2.12 (12H, s,  $\text{CH}_3$ ), 0.47 (6H, d,  $(\text{CH}_3)_2\text{CH}$ ), 1.94 (1H, sep,  $(\text{CH}_3)_2\text{CH}$ ), 7.28 (2H, m, py), 7.68 (1H, m, py), 8.58 (2H, m, py).

$[\text{Co}^{\text{III}}(\text{dmgH})_2(\text{cis-1,2-dichlorovinyl})(\text{py})]$  (**10**) was prepared using the procedure described by Follett *et al.*<sup>6</sup> Anal. Calcd. for  $\text{CoN}_5\text{Cl}_2\text{O}_4\text{C}_{15}\text{H}_{20}$ : C: 38.81, H: 4.34, N: 15.09; found C: 38.70, H: 4.38, N: 14.98.  $^1\text{H}$  NMR (400MHz,  $\text{CDCl}_3$ ):  $\delta$  ppm 2.19 (12H, s,  $\text{CH}_3$ ), 5.79 (1H, s,  $\text{CCl}=\text{CHCl}$ ), 7.32 (2H, m, py), 7.74 (1H, m, py), 8.55 (2H, m, py).

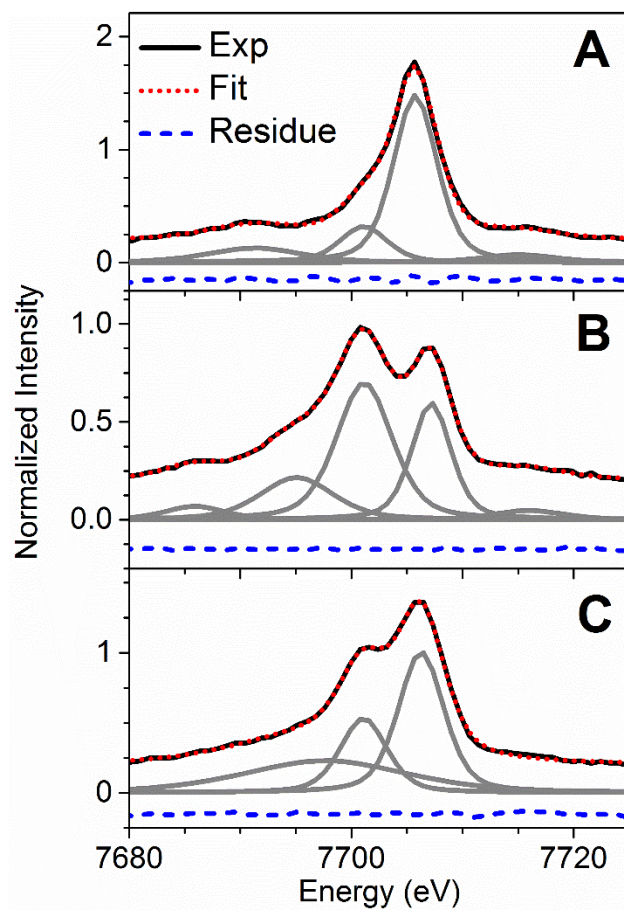

**Figure S1.** Fits to the background-subtracted normalized cobalt  $K\beta$  V2C X-ray emission spectra of  $[\text{Co}^{\text{III}}(\text{NH}_3)_6]\text{Cl}_3$  (Panel A),  $[\text{Co}^{\text{III}}(\text{acac})_3]$  (Panel B), and  $[\text{Co}^{\text{III}}(\text{dmGH})(\text{dmGH}_2)(\text{Cl})_2]$  (Panel C).

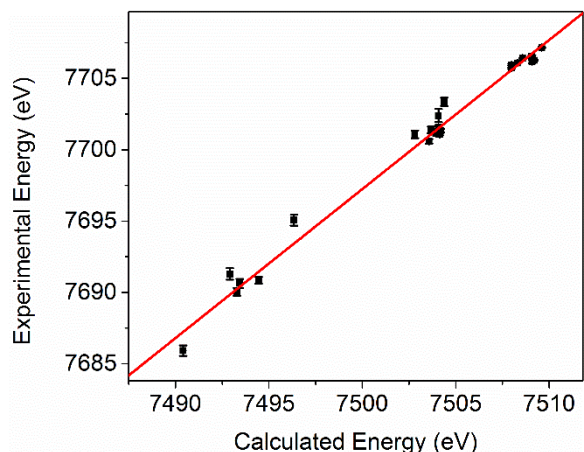

**Figure S2.** Correlation of calculated vs. experimental V2C X-ray emission energies for low-spin octahedral cobalt(III) complexes. The linear fit gives a slope of  $1.045 \pm 0.029$ , and an intercept of  $-138.2 \pm 220.7$ . The width-modulated calculated spectra (hwhm: 2.0 eV) were curve-fitted with three to four pseudo-Voigt functions having a fixed 50:50 proportion of Gaussian and Lorentzian character in order to determine the center energies of  $K\beta_{2,5}$  and  $K\beta''$  peaks of the calculated spectra. The center energies of the  $K\beta_{2,5}$  and  $K\beta''$  peaks of the experimental spectra were obtained following procedures described in the experimental section of the text. Error bars of both experimental and calculated data shown in the figure represent the standard deviation.

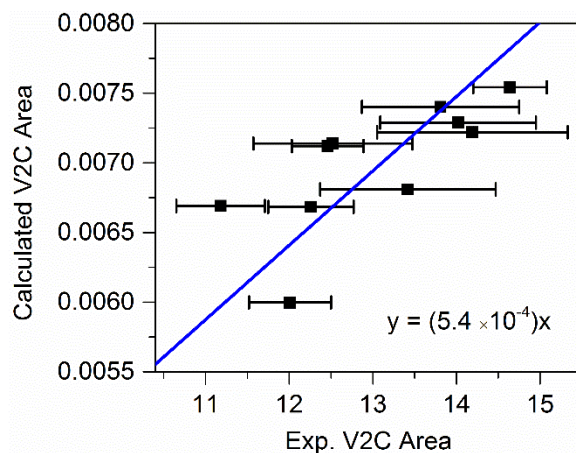

**Figure S3.** Correlation of calculated vs. experimental V2C areas for low-spin octahedral cobalt(III) complexes. The linear fit has been forced through the origin (intercept = 0), and the slope is  $(5.4 \pm 0.1) \times 10^{-4}$ . Error bars represent the standard deviation. The calculated V2C area is taken from the calculated oscillator strength that encompasses the electric dipole, magnetic dipole, and electric quadrupole contributions.

**Table S1.** Details of V2C XES curve-fitting results for complexes **1 – 10**.

| <b>[Co(NH<sub>3</sub>)<sub>6</sub>]Cl<sub>3</sub> (1)</b>                 |                          |        |                       |
|---------------------------------------------------------------------------|--------------------------|--------|-----------------------|
|                                                                           | Center (eV) <sup>c</sup> | Height | Area <sup>c</sup>     |
|                                                                           | 7705.7(1)                | 1.48   | 8.79(33)              |
|                                                                           | 7701.1(3)                | 0.32   | 2.05(22)              |
| WSSR <sup>a</sup> =                                                       | 7691.3(4)                | 0.13   | 1.62(16)              |
| 0.0151                                                                    | 7715.1(6)                | 0.07   | 0.70(12) <sup>b</sup> |
|                                                                           |                          |        | <b>Total 12.5(4)</b>  |
| <b>[Co(NH<sub>3</sub>)<sub>5</sub>Cl]Cl<sub>2</sub> (2)</b>               |                          |        |                       |
|                                                                           | Center (eV) <sup>c</sup> | Height | Area <sup>c</sup>     |
|                                                                           | 7706.1(1)                | 1.09   | 5.58(32)              |
|                                                                           | 7703.4(3)                | 0.42   | 5.30(37)              |
| WSSR =                                                                    | 7690.8(2)                | 0.12   | 1.13(9)               |
| 0.00711                                                                   | 7715.7(3)                | 0.07   | 0.43(7) <sup>b</sup>  |
|                                                                           |                          |        | <b>Total 12.0(5)</b>  |
| <b>[Co(NH<sub>3</sub>)<sub>4</sub>(CO<sub>3</sub>)]NO<sub>3</sub> (3)</b> |                          |        |                       |
|                                                                           | Center (eV) <sup>c</sup> | Height | Area <sup>c</sup>     |
|                                                                           | 7706.0(1)                | 1.19   | 7.37(32)              |
|                                                                           | 7701.4(2)                | 0.39   | 3.14(38)              |
| WSSR =                                                                    | 7690.6(3)                | 0.13   | 1.75(13)              |
| 0.00599                                                                   | 7715.9(3)                | 0.07   | 0.59(06) <sup>b</sup> |
|                                                                           |                          |        | <b>Total 12.3(5)</b>  |
| <b>[Co(en)<sub>3</sub>]Cl<sub>3</sub> (4)</b>                             |                          |        |                       |
|                                                                           | Center (eV) <sup>c</sup> | Height | Area <sup>c</sup>     |
|                                                                           | 7706.4(1)                | 1.08   | 5.78(57)              |
|                                                                           | 7702.4(5)                | 0.48   | 5.48(76)              |
| WSSR =                                                                    | 7689.0(3)                | 0.12   | 1.27(12)              |
| 0.00598                                                                   | 7716.0(5)                | 0.06   | 0.52(16) <sup>b</sup> |
|                                                                           |                          |        | <b>Total 12.5(10)</b> |
| <b>[Co(acac)<sub>3</sub>] (5)</b>                                         |                          |        |                       |
|                                                                           | Center (eV) <sup>c</sup> | Height | Area <sup>c</sup>     |
|                                                                           | 7707.2(1)                | 0.60   | 3.18(9)               |
|                                                                           | 7701.1(1)                | 0.70   | 5.30(35)              |
|                                                                           | 7695.1(4)                | 0.22   | 2.15(37)              |
| WSSR =                                                                    | 7685.9(4)                | 0.07   | 0.56(9)               |
| 0.00282                                                                   | 7716.0(4)                | 0.05   | 0.45(5) <sup>b</sup>  |
|                                                                           |                          |        | <b>Total 11.2(5)</b>  |



| <b>[Co(dmgh)(dmgh<sub>2</sub>)Cl<sub>2</sub>] (6)</b>         |                          |        |                       |
|---------------------------------------------------------------|--------------------------|--------|-----------------------|
|                                                               | Center (eV) <sup>c</sup> | Height | Area <sup>c</sup>     |
|                                                               | 7706.5(1)                | 1.00   | 5.65(21)              |
|                                                               | 7701.6(1)                | 0.55   | 4.52(68)              |
| WSSR =                                                        | 7695.6(15)               | 0.18   | 3.25(77)              |
| 0.00584                                                       | 7715.5(3)                | 0.05   | 0.22(5) <sup>b</sup>  |
|                                                               |                          |        | <b>Total 13.4(10)</b> |
| <b>[Co(dmgh)<sub>2</sub>(Cl)(py)] (7)</b>                     |                          |        |                       |
|                                                               | Center (eV) <sup>c</sup> | Height | Area <sup>c</sup>     |
|                                                               | 7706.3(1)                | 1.01   | 6.21(21)              |
| WSSR =                                                        | 7701.1(1)                | 0.53   | 3.35(22)              |
| 0.00713                                                       | 7697.6(5)                | 0.23   | 5.08(31)              |
|                                                               |                          |        | <b>Total 14.6(4)</b>  |
| <b>[Co(dmgh)<sub>2</sub>(py)<sub>2</sub>] (8)</b>             |                          |        |                       |
|                                                               | Center (eV) <sup>c</sup> | Height | Area <sup>c</sup>     |
|                                                               | 7706.5(1)                | 0.96   | 6.02(28)              |
|                                                               | 7701.4(1)                | 0.69   | 5.35(65)              |
| WSSR =                                                        | 7694.2(13)               | 0.15   | 2.65(60)              |
| 0.0119                                                        |                          |        | <b>Total 14.0(9)</b>  |
| <b>[Co(dmgh)<sub>2</sub>(<sup>i</sup>Pr)(py)] (9)</b>         |                          |        |                       |
|                                                               | Center (eV) <sup>c</sup> | Height | Area <sup>c</sup>     |
|                                                               | 7706.2(1)                | 0.889  | 4.867                 |
|                                                               | 7700.6(2)                | 0.794  | 5.977                 |
| WSSR =                                                        | 7692.9(17)               | 0.084  | 0.474                 |
| 0.0200                                                        |                          |        | <b>Total 14.2(11)</b> |
| <b>[Co(dmgh)<sub>2</sub>(cis-1,2-dichlorovinyl)(py)] (10)</b> |                          |        |                       |
|                                                               | Center (eV) <sup>c</sup> | Height | Area <sup>c</sup>     |
|                                                               | 7706.6(1)                | 1.01   | 6.09(26)              |
| WSSR =                                                        | 7701.2(1)                | 0.67   | 5.37(66)              |
| 0.0137                                                        | 7693.7(16)               | 0.13   | 2.35(63)              |
|                                                               |                          |        | <b>Total 13.8(9)</b>  |

<sup>a</sup> Weighted Sum of Squared Residuals (WSSR), also called chi-square, is defined as  $\chi^2(\mathbf{a}) = \sum_{i=1}^N \left[ \frac{y_i - y(x_i; \mathbf{a})}{\sigma_i} \right]^2$ , where  $\sigma$  is the standard deviation. <sup>b</sup> This high-energy peak above the K $\beta_{2,5}$  feature is not included in the V2C total area. <sup>c</sup> Uncertainties associated with the energy and area of each peak are determined using the Fityk program with a pseudo-VoigtA function; for all fits, the shape parameter is fixed to 0.5, and the active range is set to 7680 – 7725 eV. V2C XES spectra of cobalt complexes **1** to **6** are well fitted by four or five peak. For complexes **7** to **10**, while a four-peak fit model improves the goodness-of-fit with a significantly reduced WSSR value compared to a three-peak fit, one of the individual peaks (~7708 eV) has a very large uncertainty in peak area. We therefore consider the three-peak fit as the best curve-fitting model.

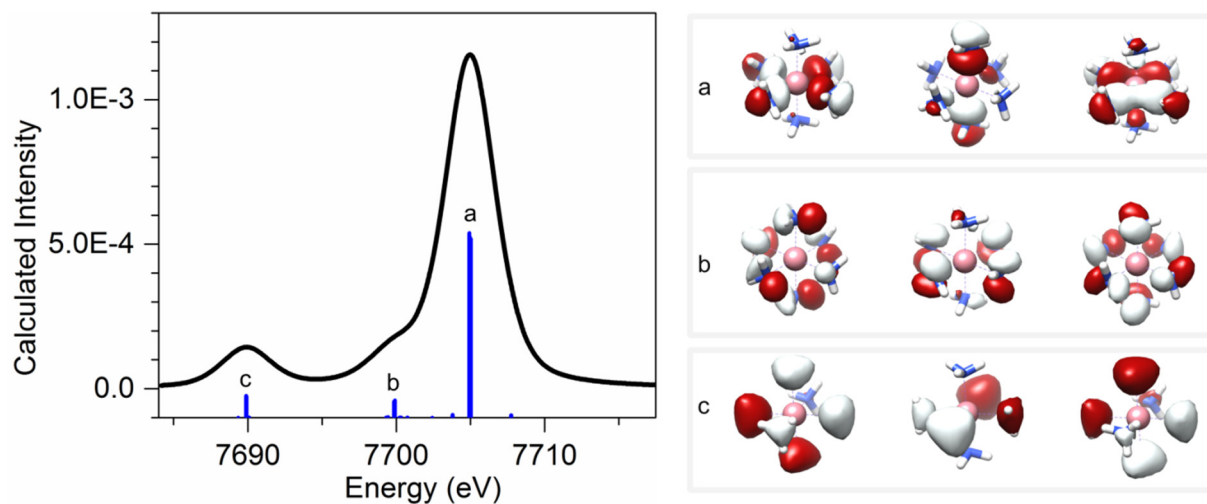

**Figure S4.** Calculated cobalt  $K\beta$  V2C X-ray Emission spectra of  $[\text{Co}^{\text{III}}(\text{NH}_3)_6]\text{Cl}_3$  (1) and molecular orbitals (labeled as MOs a to c) that contribute significantly to the calculated V2C X-ray emission spectrum. MOs are visualized with a contour level of 0.05.

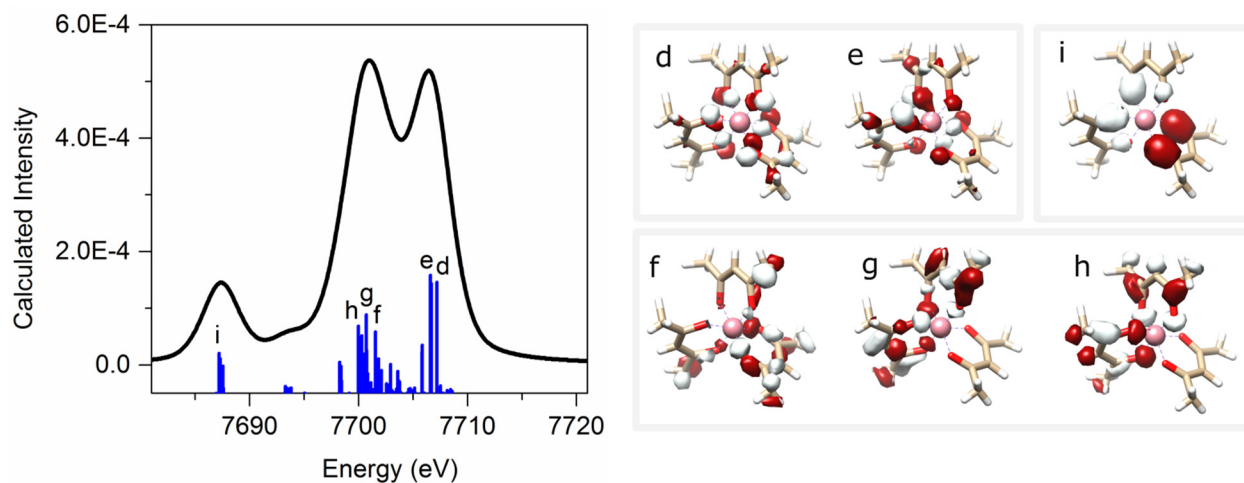

**Figure S5.** Calculated cobalt  $K\beta$  V2C X-ray Emission spectra of  $[\text{Co}^{\text{III}}(\text{acac})_3]$  (5) and molecular orbitals (labeled as MOs d to i) that contribute significantly to the calculated V2C X-ray emission spectrum. MOs are visualized with contour level of 0.05.

**Table S2.** Löwdin population analysis results for molecular orbitals that contribute significantly to the cobalt  $K\beta$  V2C X-ray emission spectrum of  $[\text{Co}^{\text{III}}(\text{NH}_3)_6]\text{Cl}_3$  (**1**) based on crystal structure coordinates (CSD Refcode: ADIYES)

| MO label | Co s | Co p | Co d | N s   | N p   | H s   |
|----------|------|------|------|-------|-------|-------|
| a        | 0%   | 9.3% | 0%   | 3.2%  | 76.6% | 4.2%  |
|          | 0%   | 9.2% | 0%   | 3.3%  | 76.5% | 4.3%  |
|          | 0%   | 9.3% | 0%   | 3.5%  | 76.6% | 4.4%  |
| b        | 0%   | 1.3% | 0%   | 0%    | 61.9% | 32.5% |
|          | 0%   | 1.4% | 0%   | 0.2%  | 61.8% | 32.7% |
|          | 0%   | 1.5% | 0%   | 0%    | 61.8% | 32.6% |
| c        | 0%   | 3.4% | 0%   | 46.5% | 0.9%  | 41.5% |
|          | 0%   | 3.3% | 0%   | 46.6% | 0.9%  | 41.5% |
|          | 0%   | 3.2% | 0%   | 46.6% | 1.2%  | 41.5% |

**Table S3.** Fits to experimental vs DFT-calculated-and-width-modulated spectra of complex **1**.

| Experimental spectrum of <b>1</b> (eV) <sup>a</sup> | <sup>b</sup> Calculated spectrum of <b>1</b> (eV) |
|-----------------------------------------------------|---------------------------------------------------|
| 7705.7                                              | 7705.7                                            |
| 7701.1                                              | 7700.6                                            |
| 7691.3                                              | 7690.6                                            |
| 7715.1                                              |                                                   |

<sup>a</sup> Peak centers of pseudo-Voigt functions fitted to the experimental spectrum of **1**; <sup>b</sup> Scalar-corrected peak energies of MOs a-c that contribute intensely to calculated V2C X-ray emission spectrum of **1**.

**Table S4.** Löwdin population analysis results for molecular orbitals that contribute significantly to the cobalt  $K\beta$  V2C X-ray emission spectrum of  $[\text{Co}^{\text{III}}(\text{acac})_3]$  (**5**) based on crystal structure coordinates (CSD Refcode: ACOSEU).

| MO label | Co s | Co p | Co d | C s   | C p   | O s   | O p   | H s   |
|----------|------|------|------|-------|-------|-------|-------|-------|
| d        | 0%   | 1.2% | 0.9% | 1.2%  | 26.7% | 0.4%  | 63.2% | 0.4%  |
| e        | 0%   | 1.9% | 5.8% | 1.4%  | 25.5% | 1.4%  | 57.5% | 1.6%  |
| f        | 0%   | 2.1% | 1.4% | 0.8%  | 50.3% | 1.4%  | 25.0% | 16.9% |
| g        | 0%   | 2.3% | 1.1% | 0.6%  | 53.1% | 2.8%  | 23.7% | 13.6% |
| h        | 0%   | 2.1% | 3.3% | 9.6%  | 32.2% | 9.2%  | 30.0% | 10.9% |
| i        | 0.1% | 2.7% | 0.3% | 21.1% | 14.8% | 52.2% | 5.8%  | 0.7%  |

**Table S5.** Löwdin population analysis results of molecular orbitals that contribute significantly to the cobalt  $K\beta$  V2C X-ray emission spectrum of geometry-optimized  $[\text{Co}^{\text{III}}(\text{dmgH})(\text{dmgH}_2)\text{Cl}_2]$  (**6**).

| MO label | Co s | Co p | Co d | Cl s  | Cl p  | O s  | O p   | N s  | N p   | C s  | C p   | H s  |
|----------|------|------|------|-------|-------|------|-------|------|-------|------|-------|------|
| j        | 0%   | 4.1% | 3.0% | 0.1%  | 20.1% | 0.4% | 46.7% | 1.4% | 12.9% | 0.7% | 6.2%  | 1.5% |
| k        | 0%   | 3.2% | 8.4% | 0.2%  | 11.7% | 1.8% | 35.2% | 1.1% | 19.7% | 0.2% | 10.8% | 4.8% |
| l        | 0.1% | 2.8% | 0.3% | 0.1%  | 0.6%  | 2.3% | 19.8% | 4.1% | 34.8% | 1.5% | 26.5% | 6.0% |
| m        | 0.2% | 5.4% | 0.4% | 67.9% | 0%    | 0.4% | 0.7%  | 1.8% | 1.3%  | 9.0% | 6.1%  | 5.2% |

**Table S6.** Löwdin population analysis results for molecular orbitals that have >20% Löwdin population from the two chloride ligands *and* contribute significantly to the intensity of the K $\beta$  V2C X-ray emission spectra of geometry-optimized [Co<sup>III</sup>(dmgH)(dmgH<sub>2</sub>)(Cl)<sub>2</sub>].

| MO label | Co s | Co p | Co d  | Cl s  | Cl p  | O s  | O p   | N s  | N p   | C s  | C p   | H s  |
|----------|------|------|-------|-------|-------|------|-------|------|-------|------|-------|------|
| $\alpha$ | 0.2% | 5.4% | 0.4%  | 67.9% | 0%    | 0.4% | 0.7%  | 1.8% | 1.3%  | 9.0% | 6.1%  | 5.2% |
| $\beta$  | 0%   | 2.5% | 8.6%  | 0.4%  | 29.9% | 0%   | 43.0% | 0%   | 2.2%  | 0%   | 9.2%  | 1.8% |
|          | 0%   | 4.1% | 3.0%  | 0.1%  | 20.1% | 0.4% | 46.7% | 1.4% | 12.9% | 0.7% | 6.2%  | 1.5% |
|          | 0%   | 1.4% | 21.7% | 0%    | 56.6% | 0%   | 15.8% | 0%   | 1.5%  | 0%   | 1.3%  | 0.4% |
|          | 0%   | 1.9% | 4.9%  | 0.2%  | 40.0% | 0%   | 17.5% | 0%   | 4.2%  | 0%   | 23.9% | 5.2% |

**Table S7.** Löwdin population analysis results for molecular orbitals that have >20% Löwdin population from the two pyridine ligands *and* contribute significantly to the intensity of the K $\beta$  V2C X-ray emission spectra of geometry-optimized [Co<sup>III</sup>(dmgH)<sub>2</sub>(py)<sub>2</sub>]<sup>+</sup>.

| MO label   | cobalt |      |      | Pyridine |       |      |       |       | dmg ligands |       |      |       |     |       |      |
|------------|--------|------|------|----------|-------|------|-------|-------|-------------|-------|------|-------|-----|-------|------|
|            | Co s   | Co p | Co d | C s      | C p   | N s  | N p   | H s   | O s         | O p   | N s  | N p   | C s | C p   | H s  |
| $\gamma$   | 0%     | 1.9% | 0%   | 4.6%     | 47.8% | 0.8% | 11.2% | 22.6% | 0%          | 2.0%  | 0%   | 5.0%  | 0%  | 1.2%  | 0%   |
| $\delta$   | 0%     | 2.1% | 0%   | 2.4%     | 29.0% | 1.0% | 15.8% | 13.2% | 0%          | 1.4%  | 0%   | 2.0%  | 0%  | 21.5% | 9.2% |
| $\epsilon$ | 0%     | 4.7% | 0%   | 0%       | 32.4% | 2.4% | 27.8% | 12.2% | 0%          | 12.2% | 0%   | 0.6%  | 0%  | 2.6%  | 0.8% |
| $\zeta$    | 0%     | 1.7% | 0%   | 0%       | 44.6% | 0%   | 16.6% | 0%    | 0.8%        | 10.0% | 2.0% | 14.6% | 0%  | 4.8%  | 1.2% |

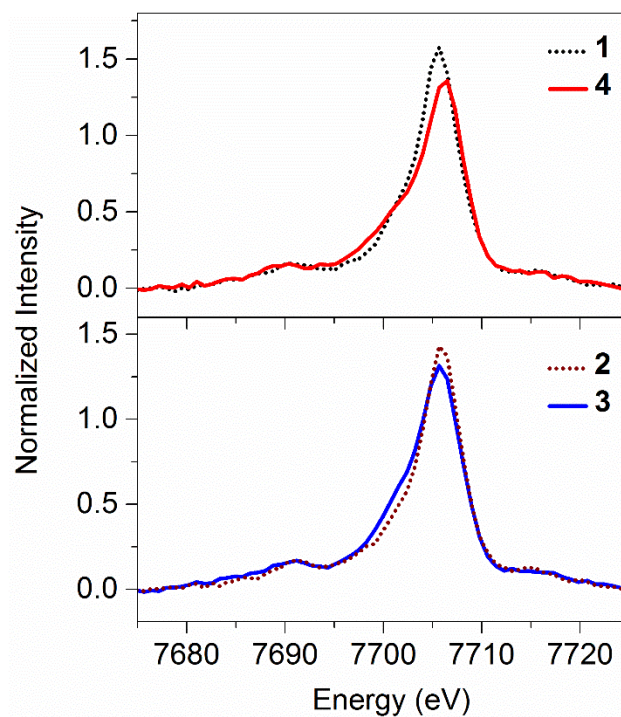

**Figure S6.** Energy-calibrated background-subtracted normalized experimental cobalt  $K\beta$  X-ray emission spectra of cobalt complexes **1** and **4** (Panel A), and complexes **2** and **3** (Panel B).

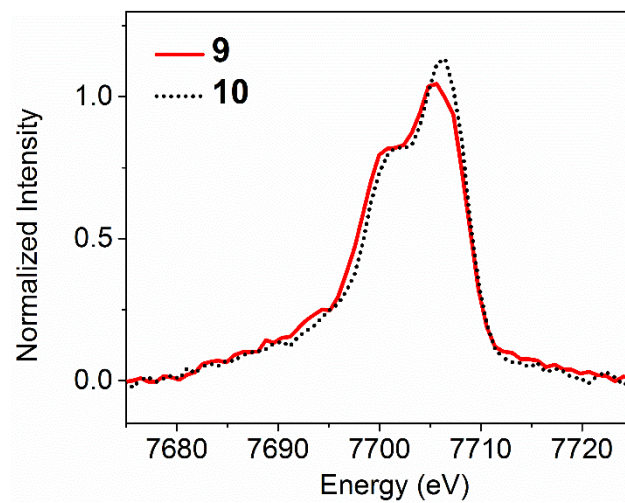

**Figure S7.** Energy-calibrated background-subtracted normalized experimental cobalt  $K\beta$  X-ray emission spectra of cobalt complexes **9** and **10**.

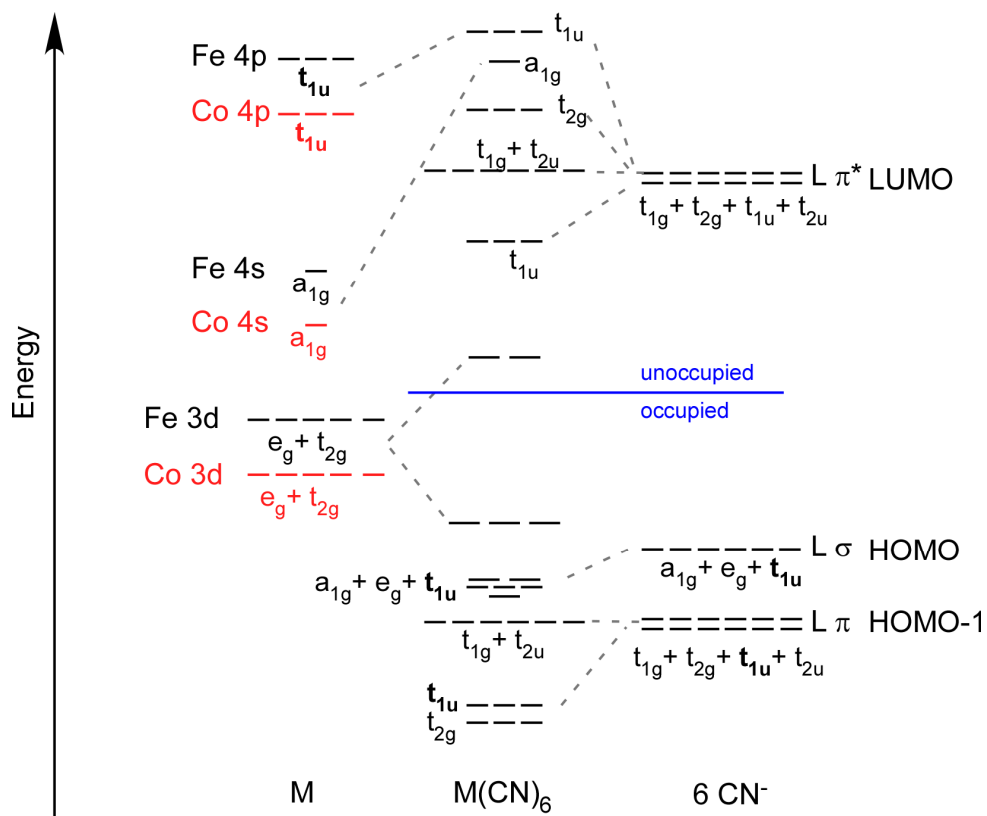

**Figure S8.** Qualitative MO diagram for octahedral  $ML_6$  complexes with L being a  $\pi$ -acceptor like  $CN^-$ , and M being  $Fe^{3+}$  or  $Co^{3+}$ .

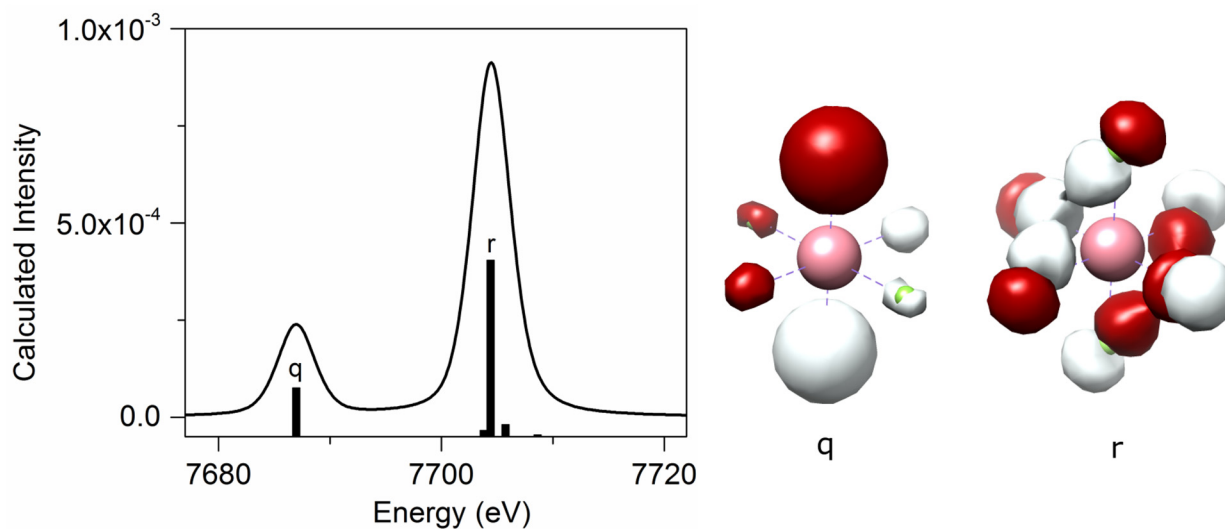

**Figure S9.** Calculated cobalt  $K\beta$  V2C X-ray Emission spectra of the hypothetical low-spin  $[Co^{III}F_6]^{3-}$  complex and key molecular orbitals (labeled as MOs q and r) that contribute significantly to the calculated V2C X-ray emission spectrum. MOs are visualized with a contour level of 0.05.

## Sample Gaussian Geometry Optimization Input File

```
%chk=Cbl_1chloroethyl_pyr.chk  
%nprocshared=16  
%mem=30GB  
#p opt=maxcycles=512 freq ub3lyp/6-31g(d) geom=connectivity scf(MaxCycle=512)
```

Title line

0 1

Molecular specification (xyz coordinates and connectivity table)



## Sample ORCA XES Calculation Input File

```
! RKS BP86 TZVP def2-TZV/J TightSCF SlowConv SCFConv7 COSMO  
! Grid4 NoFinalGrid Normalprint
```

```
%scf  
MaxIter 500  
end
```

```
%maxcore 1024
```

```
%xes CoreOrb 0  
OrbOp 0  
end
```

```
* xyz 3 1  
Co    0    0    0  
N     .....  
*
```

**Optimized xyz coordinates for [Co<sup>III</sup>(NH<sub>3</sub>)<sub>6</sub>]<sup>3+</sup>**

|    |             |             |             |
|----|-------------|-------------|-------------|
| Co | 0.00000000  | 0.00000000  | 0.00000000  |
| N  | 0.01746854  | 2.01337005  | 0.00006083  |
| H  | -0.88337570 | 2.45501533  | 0.22333774  |
| H  | 0.28089412  | 2.43772205  | -0.89830351 |
| H  | 0.67107943  | 2.43663772  | 0.67119213  |
| N  | -2.01396500 | -0.00232762 | 0.00034433  |
| H  | -2.43788041 | -0.89667510 | 0.27842047  |
| H  | -2.44853373 | 0.20101326  | -0.90864594 |
| H  | -2.44513780 | 0.68053285  | 0.63650649  |
| N  | 0.01360191  | 0.01414944  | -2.01366628 |
| H  | -0.22369579 | -0.88316013 | -2.45493786 |
| H  | 0.91912151  | 0.25959919  | -2.43358636 |
| H  | -0.64301096 | 0.67922302  | -2.44217971 |
| N  | -0.01279266 | -0.01295699 | 2.01384848  |
| H  | -0.92061535 | -0.24745556 | 2.43489417  |
| H  | 0.23522587  | 0.88206538  | 2.45386599  |
| H  | 0.63664420  | -0.68494309 | 2.44247148  |
| N  | 2.01357306  | 0.00000000  | 0.00000000  |
| H  | 2.44753490  | -0.21830409 | 0.90571855  |
| H  | 2.43963261  | 0.89740602  | -0.26431177 |
| H  | 2.44303377  | -0.67418160 | -0.64650073 |
| N  | -0.01687569 | -2.01348257 | -0.00064037 |
| H  | -0.28348579 | -2.43824332 | 0.89665078  |
| H  | 0.88495077  | -2.45479651 | -0.22073364 |
| H  | -0.66800801 | -2.43625791 | -0.67442201 |

**Reoriented xyz coordinates for [Co<sup>III</sup>(NH<sub>3</sub>)<sub>6</sub>]<sup>3+</sup> based on a crystal structure (CSD Refcode: ADIYES)**

|    |             |             |             |
|----|-------------|-------------|-------------|
| Co | 0           | 0           | 0           |
| N  | 0.0238582   | 1.95391172  | -0.0001242  |
| H  | 0.07427808  | 2.25722192  | 0.85722268  |
| H  | -0.73720266 | 2.26668043  | -0.38780807 |
| H  | 0.74716322  | 2.24880789  | -0.46877715 |
| N  | 1.95398989  | 0           | 0           |
| H  | 2.25740659  | 0.36711916  | -0.77555531 |
| H  | 2.2557564   | -0.85544044 | 0.06795865  |
| H  | 2.257153    | 0.48653087  | 0.70671022  |
| N  | 0.01143826  | 0.01637733  | 1.95174094  |
| H  | 0.68354436  | 0.55277122  | 2.24740195  |
| H  | 0.14016533  | -0.83103939 | 2.26106359  |
| H  | -0.78652549 | 0.33262409  | 2.25756484  |
| N  | -0.0531984  | -1.95957205 | -0.05665515 |
| H  | -0.69442862 | -2.2292464  | -0.64301894 |
| H  | -0.24450913 | -2.28201983 | 0.77174359  |
| H  | 0.75693856  | -2.275913   | -0.32604769 |
| N  | -1.95600068 | -0.02155335 | 0.01391186  |
| H  | -2.26282013 | 0.72930379  | 0.4256498   |
| H  | -2.24829369 | -0.75567141 | 0.46405699  |
| H  | -2.26524781 | -0.04692647 | -0.84180637 |
| N  | 0.00685159  | 0.03519519  | -1.97083845 |
| H  | -0.84163736 | 0.15741618  | -2.2745531  |
| H  | 0.33095614  | -0.75300854 | -2.28691246 |
| H  | 0.5349085   | 0.71785305  | -2.25997971 |

**Optimized xyz coordinates for [Co<sup>III</sup>(NH<sub>3</sub>)<sub>5</sub>Cl]<sup>2+</sup>**

|    |             |             |             |
|----|-------------|-------------|-------------|
| Co | 0.00000000  | 0.00000000  | 0.00000000  |
| Cl | 0.08424536  | 0.0846196   | 2.21934842  |
| N  | 0.00982108  | -1.99097996 | 0.1543627   |
| H  | 0.58894058  | -2.51447106 | -0.51004626 |
| H  | 0.35714077  | -2.22700697 | 1.09177213  |
| N  | -1.99026117 | -0.00129379 | 0.16052186  |
| H  | -2.52296006 | -0.57011438 | -0.50545632 |
| H  | -2.22894403 | -0.34497562 | 1.09835747  |
| N  | 0.00490878  | 1.99774362  | -0.00005772 |
| H  | -0.67320311 | 2.47544744  | -0.60218537 |
| H  | -0.19655736 | 2.30272585  | 0.96017208  |
| N  | 1.99770331  | 0.00000000  | 0.00000000  |
| H  | 2.30014365  | 0.26334462  | 0.94600341  |
| H  | 2.43777847  | -0.90982185 | -0.16904373 |
| N  | -0.09894903 | -0.08500686 | -2.02731224 |
| H  | -0.64432196 | 0.67184272  | -2.4514423  |
| H  | 0.81031228  | -0.04006835 | -2.4978757  |
| H  | -2.42295667 | 0.92653686  | 0.11976882  |
| H  | 0.90415155  | 2.43378016  | -0.22565169 |
| H  | 2.47267949  | 0.64341323  | -0.64126395 |
| H  | -0.91273598 | -2.43454278 | 0.10691055  |
| H  | -0.53000349 | -0.94292225 | -2.38584249 |

**Optimized xyz coordinates for [Co<sup>III</sup>(NH<sub>3</sub>)<sub>4</sub>(CO<sub>3</sub>)<sup>+</sup>**

|    |             |             |             |
|----|-------------|-------------|-------------|
| Co | 0           | 0           | 0           |
| O  | -1.78233133 | -0.47560419 | 0.00117976  |
| O  | -0.10643988 | -1.84164289 | 0.00324376  |
| O  | -2.22342272 | -2.72784368 | 0.00538959  |
| N  | -0.08678728 | -0.10347783 | 1.97689683  |
| N  | -0.41055613 | 1.99003417  | -0.00331243 |
| N  | 2.03173341  | 0           | 0           |
| N  | -0.08759712 | -0.1103227  | -1.97639784 |
| C  | -1.46565655 | -1.79826981 | 0.00355515  |
| H  | -1.07787588 | -0.02774918 | 2.22252944  |
| H  | 0.4319926   | 0.53179172  | 2.58651159  |
| H  | 0.18489921  | -1.05953651 | 2.22320844  |
| H  | -1.43426293 | 2.03035361  | -0.00301162 |
| H  | -0.10845879 | 2.52975649  | -0.81683216 |
| H  | -0.10803903 | 2.5324466   | 0.80836575  |
| H  | 2.5011936   | 0.41420994  | 0.80784371  |
| H  | 2.49952016  | 0.39731898  | -0.81723433 |
| H  | 2.27868561  | -0.9941361  | 0.00967837  |
| H  | -1.07902577 | -0.03639369 | -2.22156312 |
| H  | 0.18482393  | -1.06686206 | -2.21998658 |
| H  | 0.43001348  | 0.52362046  | -2.5884819  |

**Optimized xyz coordinates for [Co<sup>III</sup>(en)<sub>3</sub>]<sup>3+</sup>**

|    |         |         |         |
|----|---------|---------|---------|
| Co | 0.0008  | 0.0004  | 0.0002  |
| N  | 0.4329  | -1.6001 | -1.1275 |
| N  | -1.0109 | -1.3168 | 1.1263  |
| N  | -1.6024 | 0.4278  | -1.1317 |
| N  | -0.6389 | 1.5330  | 1.1270  |
| N  | 1.1736  | 1.1757  | -1.1279 |
| N  | 1.6462  | -0.2143 | 1.1296  |
| C  | -0.4570 | -2.7660 | -0.7526 |
| C  | -0.6264 | -2.7323 | 0.7526  |
| C  | -2.1707 | 1.7784  | -0.7514 |
| C  | -2.0585 | 1.9023  | 0.7543  |
| C  | 2.6275  | 0.9858  | -0.7518 |
| C  | 2.6820  | 0.8238  | 0.7537  |
| H  | 1.4068  | -1.9026 | -1.0237 |
| H  | 0.3416  | -1.4432 | -2.1365 |
| H  | -2.0263 | -1.2280 | 1.0169  |
| H  | -0.8725 | -1.2068 | 2.1362  |
| H  | -2.3499 | -0.2666 | -1.0325 |
| H  | -1.4192 | 0.4339  | -2.1405 |
| H  | -0.0582 | 2.3710  | 1.0182  |
| H  | -0.6113 | 1.3574  | 2.1367  |
| H  | 0.9500  | 2.1707  | -1.0231 |
| H  | 1.0840  | 1.0196  | -2.1373 |
| H  | 2.0770  | -1.1391 | 1.0282  |
| H  | 1.4787  | -0.1424 | 2.1386  |
| H  | -0.0188 | -3.7091 | -1.0934 |
| H  | -1.4133 | -2.6446 | -1.2705 |
| H  | -1.3875 | -3.4405 | 1.0940  |
| H  | 0.3055  | -2.9795 | 1.2703  |
| H  | -3.2063 | 1.8697  | -1.0929 |

|   |         |        |         |
|---|---------|--------|---------|
| H | -1.5882 | 2.5491 | -1.2651 |
| H | -2.2962 | 2.9132 | 1.0995  |
| H | -2.7355 | 1.2139 | 1.2694  |
| H | 3.2270  | 1.8353 | -1.0930 |
| H | 2.9991  | 0.0957 | -1.2685 |
| H | 3.6752  | 0.5170 | 1.0956  |
| H | 2.4324  | 1.7555 | 1.2705  |

**Optimized xyz coordinates for [Co<sup>III</sup>(acac)<sub>3</sub>]**

|    |             |             |             |
|----|-------------|-------------|-------------|
| Co | 0.00000000  | -0.00000000 | 0.00000000  |
| C  | 0.14803054  | 2.11344104  | -2.38177062 |
| C  | 0.09897761  | 2.60007702  | -1.06769095 |
| O  | 0.04341273  | 1.88792250  | -0.01100948 |
| C  | 0.10857631  | 4.09175436  | -0.81680480 |
| O  | -0.20149501 | 0.09088373  | 1.87519998  |
| C  | 0.76892688  | 0.13146282  | 2.70220149  |
| C  | 2.13080119  | 0.10763017  | 2.36887991  |
| C  | 2.60817219  | 0.04235099  | 1.05198556  |
| O  | 1.88835358  | -0.00000000 | 0.00000000  |
| C  | 0.35139335  | 0.21463929  | 4.15365876  |
| C  | 4.09789574  | 0.01539919  | 0.79147290  |
| H  | 0.16727710  | 4.66878047  | -1.74286081 |
| H  | -0.80032443 | 4.37328384  | -0.27366427 |
| H  | 0.95982475  | 4.34931605  | -0.17690747 |
| H  | -0.24120672 | 1.12315185  | 4.30855275  |
| H  | 1.20790810  | 0.22444262  | 4.83203085  |
| H  | -0.29330964 | -0.63672925 | 4.39812521  |
| H  | 4.37042201  | 0.85488794  | 0.14243449  |
| H  | 4.68255462  | 0.06870344  | 1.71307331  |
| H  | 4.35478600  | -0.90449760 | 0.25452894  |
| H  | 2.85437605  | 0.14314818  | 3.17393462  |
| H  | 0.19817086  | 2.83140478  | -3.19086653 |
| O  | 0.07529898  | -0.21456974 | -1.87440478 |
| O  | 0.07377340  | -1.88171265 | 0.14364822  |
| O  | -1.87986952 | 0.11802632  | -0.13412740 |
| C  | 0.13655873  | 0.74962260  | -2.70720500 |
| C  | -0.94818993 | -2.64496116 | 0.13253184  |
| C  | -2.66795204 | -0.88441361 | -0.10433973 |



|   |             |             |             |
|---|-------------|-------------|-------------|
| C | 0.20399180  | 0.32126930  | -4.15636458 |
| C | -2.28166192 | -2.22650330 | 0.01966806  |
| C | -0.62937394 | -4.11873397 | 0.25177391  |
| C | -4.13453102 | -0.53092961 | -0.21599944 |
| H | 0.23007379  | 1.17266098  | -4.84073112 |
| H | 1.09855062  | -0.29232882 | -4.31111568 |
| H | -0.66250762 | -0.30591205 | -4.39290402 |
| H | -3.05704248 | -2.98255426 | 0.02760614  |
| H | 0.01118053  | -4.41950715 | -0.58464929 |
| H | -1.52858695 | -4.73944578 | 0.25669442  |
| H | -0.06282925 | -4.29679418 | 1.17248451  |
| H | -4.30614224 | 0.02712167  | -1.14309054 |
| H | -4.77710982 | -1.41457426 | -0.20371009 |
| H | -4.41240098 | 0.12835709  | 0.61380007  |

**Reoriented xyz coordinates for [Co<sup>III</sup>(acac)<sub>3</sub>] based on a crystal structure (CSD Refcode: ACOSEU)**

|    |             |             |             |
|----|-------------|-------------|-------------|
| Co | 0.00000000  | 0.00000000  | 0.00000000  |
| C  | 2.12638951  | -2.33341306 | -0.15180081 |
| C  | 2.60626983  | -1.03380125 | -0.09611691 |
| O  | 1.88664849  | 0.00000000  | 0.00000000  |
| C  | 4.09721837  | -0.80023862 | -0.16178862 |
| O  | 0.06949427  | 1.87813936  | 0.00121805  |
| C  | -0.12367003 | 2.59291801  | 1.03256927  |
| C  | -0.25451743 | 2.08141312  | 2.32143613  |
| C  | -0.14006803 | 0.76358049  | 2.69060794  |
| O  | 0.00981852  | -0.21113365 | 1.88597720  |
| C  | -0.19699162 | 4.04138796  | 0.75756631  |
| C  | -0.20789343 | 0.34473276  | 4.12923514  |
| H  | 4.54454891  | -1.52097356 | 0.15802960  |
| H  | 4.16106322  | -0.27086648 | -0.80456946 |
| H  | 4.41647066  | -0.17116659 | 0.38068059  |
| H  | 0.42296367  | 4.32454690  | 0.09843830  |
| H  | -0.06238131 | 4.49466959  | 1.30543499  |
| H  | -1.31473723 | 4.23263316  | 0.32470205  |
| H  | 0.44581848  | 0.52242214  | 4.45444854  |
| H  | -0.58212079 | 1.03788177  | 4.64950268  |
| H  | -0.62081482 | -0.48996222 | 4.27153716  |
| H  | -0.30818844 | 2.69128787  | 2.98211563  |
| H  | 2.85218494  | -3.12987134 | -0.20361461 |
| O  | -0.17878728 | -1.87425926 | -0.12186986 |
| O  | -1.87246993 | 0.10025046  | 0.12754722  |
| O  | 0.08682363  | 0.10487593  | -1.89290907 |
| C  | 0.78623333  | -2.68911533 | -0.14601784 |
| C  | -2.63087192 | 0.42971942  | -0.83601061 |
| C  | -0.91915733 | 0.39877019  | -2.61499090 |
| C  | 0.41716855  | -4.15387189 | -0.16052161 |

|   |             |             |             |
|---|-------------|-------------|-------------|
| C | -2.19365458 | 0.60498884  | -2.14661094 |
| C | -4.04508185 | 0.61356825  | -0.45467631 |
| C | -0.58972403 | 0.53033350  | -4.07232672 |
| H | 1.07014768  | -4.64048740 | -0.55880451 |
| H | -0.07317431 | -4.21513803 | 0.51279180  |
| H | -0.27301010 | -4.37582000 | -0.67642545 |
| H | -2.83716326 | 0.76008616  | -2.75760481 |
| H | -4.34250626 | -0.02352292 | 0.18142655  |
| H | -4.54353176 | 0.55954936  | -0.97657085 |
| H | -4.10120335 | 1.71047693  | 0.06198915  |
| H | -0.84908300 | -0.07989610 | -4.42565988 |
| H | -1.27636759 | 1.00154753  | -4.51682706 |
| H | 0.26943000  | 0.87543552  | -4.24639952 |

**Optimized xyz coordinates for [Co<sup>III</sup>(dmgH)(dmgH<sub>2</sub>)(Cl)<sub>2</sub>]**

|    |             |             |             |
|----|-------------|-------------|-------------|
| Co | 0           | 0           | 0           |
| Cl | 0           | 0           | 2.26031009  |
| O  | -2.4997946  | 1.26803826  | 0.12376632  |
| O  | 0.50304941  | -2.79574941 | -0.51880901 |
| O  | 2.6927615   | -1.22089921 | 0.14893664  |
| N  | 1.94296539  | -0.08270649 | 0.05185473  |
| O  | -0.49848344 | 2.85603696  | -0.08574805 |
| N  | -0.42423508 | -1.83584546 | -0.06434259 |
| N  | -1.9008625  | 0.14658053  | 0.05292171  |
| N  | 0.41172475  | 1.87034308  | -0.03028913 |
| C  | 1.66330737  | 2.2057116   | -0.02858389 |
| C  | -1.69081766 | -2.14666513 | -0.06260808 |
| C  | -2.21697632 | -3.53117306 | -0.27151913 |
| H  | -1.40338382 | -4.25325391 | -0.33276044 |
| H  | -2.80707428 | -3.57422962 | -1.19475103 |
| H  | -2.88367359 | -3.80408137 | 0.55381591  |
| C  | 2.10284428  | 3.63520368  | -0.08015666 |
| H  | 1.7756557   | 4.09579916  | -1.01957054 |
| H  | 3.18679246  | 3.72916817  | 0.00028754  |
| H  | 1.63265201  | 4.19927072  | 0.73258336  |
| C  | 2.57099648  | 1.04804689  | 0.03876045  |
| C  | -2.55810718 | -1.00551829 | 0.11072303  |
| C  | 4.05975435  | 1.18769217  | 0.10668475  |
| H  | 4.53543168  | 0.20788173  | 0.1270454   |
| H  | 4.35083228  | 1.73938493  | 1.00831756  |
| H  | 4.43224948  | 1.74564835  | -0.75987658 |
| C  | -4.04287727 | -1.08189876 | 0.28635019  |
| H  | -4.44554127 | -0.06931255 | 0.33424044  |
| H  | -4.30802119 | -1.60608787 | 1.21299135  |
| H  | -4.52344223 | -1.60989755 | -0.54619287 |

|    |             |             |             |
|----|-------------|-------------|-------------|
| H  | -1.38970975 | 2.35297636  | -0.00745523 |
| Cl | 0.08824767  | -0.14877052 | -2.28833914 |
| H  | 0.64526636  | -2.49923608 | -1.44969768 |
| H  | 2.02545391  | -1.94616585 | 0.10570557  |

**Optimized xyz coordinates for [Co<sup>III</sup>(dmgH)<sub>2</sub>(Cl)(py)]**

|    |             |             |             |
|----|-------------|-------------|-------------|
| Co | 0           | 0           | 0           |
| Cl | 0           | 0           | 2.23074763  |
| O  | 0.75630137  | 2.72286983  | 0.04904231  |
| O  | -2.58225212 | -1.1382261  | 0.12247194  |
| O  | -0.73274386 | -2.76999053 | 0.02244672  |
| N  | 0.28861192  | -1.88367721 | 0.03254783  |
| O  | 2.66706131  | 1.10250933  | 0.03373534  |
| N  | -1.88309411 | -0.00407784 | 0.04061957  |
| N  | -0.27340441 | 1.86752815  | 0.01861798  |
| N  | -0.05592722 | 0.03022417  | -1.96548051 |
| N  | 1.90957231  | -0.03239038 | 0.01903756  |
| C  | 2.47882124  | -1.18564132 | 0.12397548  |
| C  | -2.46596307 | 1.15308908  | -0.03262988 |
| C  | -3.94591768 | 1.31474621  | -0.09259093 |
| H  | -4.36262752 | 0.45123549  | -0.07624709 |
| H  | -4.18536787 | 1.76959585  | -0.90413231 |
| H  | -4.24321219 | 1.82848804  | 0.66200585  |
| C  | 3.94173372  | -1.38163006 | 0.33002524  |
| H  | 4.38438367  | -0.5291648  | 0.31335191  |
| H  | 4.29313981  | -1.93817228 | -0.36869611 |
| H  | 4.09185203  | -1.80242113 | 1.17959064  |
| C  | 1.51225382  | -2.29785734 | 0.09389408  |
| C  | -1.50925781 | 2.26327803  | -0.04636204 |
| C  | 1.91264206  | -3.7426223  | 0.15830253  |
| H  | 1.1277163   | -4.29442326 | 0.12444617  |
| H  | 2.38531093  | -3.90820308 | 0.97775426  |
| H  | 2.48073687  | -3.95041215 | -0.58656838 |
| C  | -1.91015308 | 3.70154457  | -0.10280096 |
| H  | -1.12559468 | 4.2532816   | -0.09875837 |

|   |             |             |             |
|---|-------------|-------------|-------------|
| H | -2.45378348 | 3.91147496  | 0.66017822  |
| H | -2.40981374 | 3.86298918  | -0.90550942 |
| C | -0.92709129 | -0.85061946 | -4.01338227 |
| H | -1.47508687 | -1.4672457  | -4.44476947 |
| C | -0.8308945  | -0.84446223 | -2.63139448 |
| H | -1.32104244 | -1.46739142 | -2.14561654 |
| C | 0.59179081  | 0.98539624  | -4.0610219  |
| H | 1.08720866  | 1.62106699  | -4.52566029 |
| C | 0.63853447  | 0.94436343  | -2.67473465 |
| H | 1.16367919  | 1.56236607  | -2.22197119 |
| C | -0.19566776 | 0.07430718  | -4.74800281 |
| H | -0.24830848 | 0.090229    | -5.86905118 |
| H | -1.70590437 | -2.01642608 | 0.05777704  |
| H | 1.7404439   | 1.94451728  | 0.05216906  |

**Optimized xyz coordinates for [Co<sup>III</sup>(dmgH)<sub>2</sub>(py)<sub>2</sub>]<sup>+</sup>**

|    |             |             |             |
|----|-------------|-------------|-------------|
| C  | -1.55422061 | -2.28808159 | 0.00010202  |
| C  | -2.49497937 | -1.16296829 | 0.00020792  |
| C  | 1.55422458  | 2.2880998   | -0.00018301 |
| C  | 2.49498387  | 1.16298297  | -0.00040091 |
| C  | -1.96532487 | -3.72801165 | 0.0000953   |
| C  | -3.98524397 | -1.3029078  | 0.00041414  |
| C  | 1.96534139  | 3.72802627  | -0.00022729 |
| C  | 3.98525142  | 1.30289971  | -0.00082814 |
| N  | -0.296732   | -1.90695784 | -0.00007236 |
| N  | -1.91551225 | 0.00001611  | -0.00004399 |
| N  | 0.29673669  | 1.90697671  | 0.00000137  |
| N  | 1.91551536  | 0           | 0           |
| O  | 0.69685618  | -2.74672295 | -0.00026463 |
| O  | -2.70177222 | 1.11147092  | -0.00003929 |
| O  | -0.69685443 | 2.7467392   | 0.00008064  |
| O  | 2.7017934   | -1.11144815 | 0.0001363   |
| Co | 0           | 0           | 0           |
| H  | -1.07356416 | -4.35578801 | -0.00016459 |
| H  | -2.56681062 | -3.97097515 | -0.88386758 |
| H  | -2.56636994 | -3.97113522 | 0.88431577  |
| H  | -4.41048709 | -0.80751322 | -0.87959331 |
| H  | -4.41064753 | -0.80271195 | 0.87757843  |
| H  | -4.29133244 | -2.34932098 | 0.00312066  |
| H  | 2.56313999  | 3.97203149  | -0.88643174 |
| H  | 2.57006948  | 3.97009775  | 0.88173856  |
| H  | 1.07359386  | 4.35580905  | 0.0037456   |
| H  | 4.41068868  | 0.80026587  | -0.87656219 |
| H  | 4.41042681  | 0.80990096  | 0.88057707  |
| H  | 4.29136869  | 2.34929157  | -0.00629966 |



|   |             |             |             |
|---|-------------|-------------|-------------|
| H | -2.01970642 | 1.87440668  | 0.0000524   |
| H | 2.01973454  | -1.87438712 | -0.00011138 |
| C | 0.6185847   | -0.98273739 | 2.67376821  |
| C | 0.63907361  | -1.01325486 | 4.06280544  |
| C | 0.00005311  | -0.00007982 | 4.77537861  |
| C | -0.63902308 | 1.01310078  | 4.06286859  |
| C | -0.61863129 | 0.98260314  | 2.67382842  |
| N | -0.00005205 | -0.00006069 | 1.98441722  |
| H | 1.09304229  | -1.76166466 | 2.09022324  |
| H | 1.15053235  | -1.82605741 | 4.567011    |
| H | 0.00009106  | -0.00009039 | 5.86109776  |
| H | -1.15045796 | 1.82588945  | 4.56711916  |
| H | -1.09313918 | 1.76152977  | 2.09032221  |
| N | 0.00006282  | 0.00008627  | -1.98446921 |
| C | -0.61845491 | 0.98282167  | -2.67383714 |
| C | 0.61867297  | -0.98257021 | -2.67387239 |
| C | -0.63879587 | 1.01341947  | -4.06287828 |
| C | 0.63920927  | -1.01299725 | -4.06291148 |
| C | 0.00025345  | 0.00025261  | -4.77544044 |
| H | 0.00032853  | 0.00031658  | -5.86115853 |
| H | 1.15062086  | -1.82580789 | -4.56715006 |
| H | 1.09306557  | -1.76156427 | -2.09036326 |
| H | -1.09295446 | 1.76173448  | -2.09030319 |
| H | -1.15018189 | 1.8262651   | -4.56708579 |

**Optimized xyz coordinates for [Co<sup>III</sup>(dmgH)<sub>2</sub>(<sup>i</sup>Pr)(py)]**

|    |             |             |             |
|----|-------------|-------------|-------------|
| Co | 0           | 0           | 0           |
| O  | 0.72900869  | -2.73000165 | 0.10641484  |
| O  | -2.56552903 | 1.18679503  | 0.06250298  |
| O  | -0.65116061 | 2.8217772   | 0.04506319  |
| N  | 0.32007325  | 1.88706744  | 0.00186305  |
| O  | 2.65968873  | -1.12770695 | 0.04026288  |
| N  | -1.88934491 | 0.05248189  | 0.02479256  |
| N  | -0.26748551 | -1.86807916 | 0.04297885  |
| N  | -0.01379664 | 0.00612904  | 2.09813492  |
| N  | 1.91883473  | 0           | 0           |
| C  | 2.51195113  | 1.15860414  | 0.01291063  |
| C  | -2.46843268 | -1.12315717 | 0.07673728  |
| C  | -3.95703859 | -1.2869213  | 0.13776219  |
| H  | -4.4179503  | -0.30842078 | 0.28250221  |
| H  | -4.25390601 | -1.95142535 | 0.9577844   |
| H  | -4.35016663 | -1.72019052 | -0.79151615 |
| C  | 4.00009803  | 1.33507037  | 0.03101983  |
| H  | 4.48888707  | 0.3620743   | -0.02472288 |
| H  | 4.32833801  | 1.84160138  | 0.94712698  |
| H  | 4.33181702  | 1.94545124  | -0.81723558 |
| C  | 1.55903041  | 2.28049634  | 0.01822362  |
| C  | -1.52321787 | -2.24173491 | 0.07920317  |
| C  | 1.9382792   | 3.7295802   | 0.05219607  |
| H  | 1.47849128  | 4.25843063  | -0.79020606 |
| H  | 3.02049598  | 3.86616522  | 0.00907456  |
| H  | 1.55922866  | 4.20430588  | 0.96496884  |
| C  | -1.91984689 | -3.68516282 | 0.15027019  |
| H  | -1.14274519 | -4.29700203 | -0.3144202  |
| H  | -2.8745727  | -3.86188615 | -0.35427177 |

|   |             |             |             |
|---|-------------|-------------|-------------|
| H | -2.02487625 | -4.02362947 | 1.19038922  |
| C | -0.89995556 | 0.84305391  | 4.16624353  |
| H | -1.59812948 | 1.50924285  | 4.66272207  |
| C | -0.85589887 | 0.80878207  | 2.77549369  |
| H | -1.51965834 | 1.41943539  | 2.17253706  |
| C | 0.81612902  | -0.82896689 | 4.19038751  |
| H | 1.49228111  | -1.5033126  | 4.70592272  |
| C | 0.80100556  | -0.80381042 | 2.7988768   |
| H | 1.44263781  | -1.45544853 | 2.21728785  |
| C | -0.04613999 | 0.01297527  | 4.89050667  |
| H | -1.53305268 | 2.2274202   | 0.0119376   |
| H | 1.91328504  | -1.89340777 | 0.01834044  |
| C | -0.11989637 | -0.12037573 | -2.03317387 |
| H | -0.99844664 | -0.7630465  | -2.15483456 |
| C | -0.42101471 | 1.20384539  | -2.73418087 |
| H | 0.43224778  | 1.89338492  | -2.70375387 |
| H | -0.63889997 | 1.01753764  | -3.79773139 |
| H | -1.28813794 | 1.71635042  | -2.30919524 |
| C | 1.06007842  | -0.82837009 | -2.69854919 |
| H | 0.83219234  | -1.00191516 | -3.76219343 |
| H | 1.97865093  | -0.22950751 | -2.6666012  |
| H | 1.27387901  | -1.80131113 | -2.2481636  |
| H | -0.0574706  | 0.01692827  | 5.97689271  |

**Optimized xyz coordinates for [Co<sup>III</sup>(dmgH)<sub>2</sub>(*cis*-1,2-dichlorovinyl)(py)]**

|    |             |             |             |
|----|-------------|-------------|-------------|
| C  | -0.09455000 | -2.66615200 | -0.63579800 |
| C  | -0.00032600 | -2.61433200 | 0.82318500  |
| C  | 0.14910800  | 2.68755000  | 0.66909200  |
| C  | 0.00276500  | 2.63220700  | -0.78365300 |
| C  | -0.19450200 | -3.93287000 | -1.42949700 |
| C  | -0.00011300 | -3.81483500 | 1.71956900  |
| C  | 0.24937800  | 3.95426600  | 1.46290000  |
| C  | -0.09903800 | 3.83275200  | -1.67429700 |
| C  | -1.91774500 | 0.04803500  | 0.15943700  |
| C  | -2.72228900 | -0.07712600 | -0.89830100 |
| N  | -0.08990800 | -1.47755900 | -1.19626000 |
| N  | 0.09353200  | -1.40795400 | 1.29502300  |
| N  | 0.19711100  | 1.49704400  | 1.22879500  |
| N  | -0.03537200 | 1.42381700  | -1.25800800 |
| O  | -0.13458000 | -1.31622100 | -2.49061000 |
| O  | 0.22911200  | -1.24808500 | 2.63787300  |
| O  | 0.39787200  | 1.33313100  | 2.50073700  |
| O  | -0.16425700 | 1.26314900  | -2.60634100 |
| Cl | -2.63992000 | 0.24233600  | 1.75965700  |
| Co | 0.03700400  | 0.00895200  | 0.01858100  |
| H  | -0.11728200 | -3.69058100 | -2.49047500 |
| H  | -1.15560600 | -4.43532300 | -1.26007700 |
| H  | 0.59984900  | -4.64061500 | -1.16489900 |
| H  | -0.72550400 | -3.67255100 | 2.52706800  |
| H  | 0.98092100  | -3.94369100 | 2.19271900  |
| H  | -0.24634000 | -4.72475800 | 1.16971700  |
| H  | -0.59679700 | 4.62066700  | 1.25855600  |
| H  | 1.16978000  | 4.50850600  | 1.23698800  |
| H  | 0.24979500  | 3.70180900  | 2.52438700  |

|    |             |             |             |
|----|-------------|-------------|-------------|
| H  | -1.08932100 | 3.86728600  | -2.14381000 |
| H  | 0.63365200  | 3.76793100  | -2.48540800 |
| H  | 0.06001700  | 4.75849100  | -1.11902200 |
| Cl | -4.48101100 | -0.05861100 | -0.88517400 |
| H  | -2.33006800 | -0.21615800 | -1.89677800 |
| H  | 0.22439400  | -0.22792300 | 2.74111300  |
| H  | -0.18145700 | 0.24188900  | -2.70495300 |
| C  | 2.67014300  | -0.30771400 | -1.33282700 |
| C  | 4.05156100  | -0.36140800 | -1.48702900 |
| C  | 4.86587900  | -0.14375800 | -0.37708900 |
| C  | 4.26147700  | 0.12204100  | 0.84994100  |
| C  | 2.87266700  | 0.16193300  | 0.92606500  |
| N  | 2.08573400  | -0.04971900 | -0.14662100 |
| H  | 2.00096300  | -0.48651600 | -2.16759200 |
| H  | 4.47102000  | -0.57286500 | -2.46514100 |
| H  | 5.94787900  | -0.18042300 | -0.46672700 |
| H  | 4.84917600  | 0.29952900  | 1.74462400  |
| H  | 2.36229900  | 0.38153700  | 1.85786500  |

**Optimized xyz coordinates for  $[\text{Co}^{\text{III}}(\text{CN})_6]^{3-}$**

|    |           |           |           |
|----|-----------|-----------|-----------|
| Co | 1.965812  | 0.512821  | -1.460000 |
| C  | 1.965812  | 0.512821  | 0.470000  |
| N  | 1.965812  | 0.512821  | 1.630000  |
| C  | 3.895812  | 0.512821  | -1.460000 |
| N  | 5.055812  | 0.512821  | -1.460000 |
| C  | 1.965812  | -1.417179 | -1.460000 |
| N  | 1.965812  | -2.577179 | -1.460000 |
| C  | 1.965812  | 0.512821  | -3.390000 |
| N  | 1.965812  | 0.512821  | -4.550000 |
| C  | 1.965812  | 2.442821  | -1.460000 |
| N  | 1.965812  | 3.602821  | -1.460000 |
| C  | 0.035812  | 0.512821  | -1.460000 |
| N  | -1.124188 | 0.512821  | -1.460000 |

**Optimized xyz coordinates for [Co<sup>III</sup>(ox)<sub>3</sub>]<sup>3-</sup>**

|    |              |              |              |
|----|--------------|--------------|--------------|
| Co | 1.603175000  | 2.574668000  | 1.953809000  |
| O  | 1.982157000  | 4.418113000  | 2.291195000  |
| O  | -0.133873000 | 3.191234000  | 1.444995000  |
| O  | 2.199320000  | 2.707223000  | 0.141728000  |
| O  | 1.172615000  | 0.765277000  | 1.510816000  |
| O  | 3.333387000  | 2.032508000  | 2.561081000  |
| O  | 1.066089000  | 2.333292000  | 3.772855000  |
| O  | 1.008510000  | 6.445588000  | 2.186388000  |
| O  | -1.326551000 | 5.093087000  | 1.270646000  |
| O  | 2.393762000  | 1.462538000  | -1.724529000 |
| O  | 1.246320000  | -0.669849000 | -0.222568000 |
| O  | 4.402790000  | 1.402678000  | 4.439787000  |
| O  | 1.901833000  | 1.712641000  | 5.769366000  |
| C  | 0.992090000  | 5.216127000  | 2.048004000  |
| C  | -0.290223000 | 4.472987000  | 1.539927000  |
| C  | 2.070014000  | 1.614080000  | -0.539924000 |
| C  | 1.444064000  | 0.440072000  | 0.287368000  |
| C  | 3.390684000  | 1.763671000  | 3.826272000  |
| C  | 2.017038000  | 1.940263000  | 4.558582000  |

**Optimized xyz coordinates for low-spin [Co<sup>III</sup>F<sub>6</sub>]<sup>3-</sup>**

|    |              |              |              |
|----|--------------|--------------|--------------|
| Co | 0.000000000  | 0.000000000  | 0.000000000  |
| F  | 0.000335290  | 1.875475825  | 0.000164089  |
| F  | -1.875824334 | 0.000000000  | -0.000398150 |
| F  | 0.000000000  | 0.000000000  | -1.875876086 |
| F  | -0.000335290 | -1.875475825 | -0.000164089 |
| F  | 1.875824334  | 0.000000000  | 0.000398150  |
| F  | 0.000000000  | 0.000000000  | 1.875876086  |



**Optimized xyz coordinates for low-spin  $[\text{Co}^{\text{III}}(\text{OH})_6]^{3-}$**

|    |         |         |         |
|----|---------|---------|---------|
| Co | 0.0181  | -0.0066 | 0.0946  |
| O  | -1.5116 | 0.3449  | -1.1870 |
| H  | -0.8592 | 0.9120  | -1.6393 |
| O  | 1.5150  | -0.1046 | 1.3252  |
| H  | 1.9422  | 0.6116  | 0.8220  |
| O  | 1.0391  | 1.3477  | -0.9481 |
| H  | 1.4094  | 0.6034  | -1.4544 |
| O  | -0.9768 | -1.5876 | 0.7556  |
| H  | -1.6860 | -1.3860 | 0.1215  |
| O  | 0.8570  | -1.3203 | -1.1407 |
| H  | 0.3411  | -1.9738 | -0.6302 |
| O  | -0.9328 | 1.3218  | 1.1707  |
| H  | -1.5553 | 1.3950  | 0.4204  |

**Optimized xyz coordinates for low-spin [Co<sup>III</sup>(dte)<sub>3</sub>]**

|    |              |              |              |
|----|--------------|--------------|--------------|
| Co | -0.001737000 | 0.002597000  | -0.000054000 |
| C  | 0.713219000  | -2.670976000 | -0.001042000 |
| C  | 1.897073000  | -4.542019000 | -1.064892000 |
| C  | 1.076237000  | -5.104339000 | -2.228313000 |
| C  | 1.959775000  | 1.954044000  | 0.000825000  |
| C  | 3.926065000  | 2.971952000  | 1.063277000  |
| C  | 2.995564000  | 3.909661000  | -1.064738000 |
| C  | 3.501197000  | 3.867616000  | 2.229717000  |
| C  | 3.887524000  | 3.473844000  | -2.230014000 |
| N  | 1.060464000  | -3.967308000 | -0.000714000 |
| N  | 2.912624000  | 2.898991000  | 0.000271000  |
| S  | 0.758259000  | 1.810934000  | -1.229031000 |
| S  | 1.184745000  | -1.557464000 | -1.231762000 |
| S  | 1.807090000  | 0.755366000  | 1.232272000  |
| S  | -1.561199000 | 1.190076000  | 1.231265000  |
| S  | -0.252544000 | -1.942625000 | 1.229187000  |
| S  | -1.945176000 | -0.242655000 | -1.232744000 |
| C  | 0.623577000  | -4.881928000 | 1.064663000  |
| C  | -2.674198000 | 0.719768000  | -0.000253000 |
| C  | 1.615572000  | -4.955959000 | 2.228179000  |
| N  | -3.970691000 | 1.066287000  | 0.000286000  |
| C  | -4.886227000 | 0.628426000  | -1.064004000 |
| C  | -4.545365000 | 1.900861000  | 1.065995000  |
| C  | -4.964955000 | 1.621337000  | -2.226461000 |
| C  | -5.105832000 | 1.077471000  | 2.228533000  |
| H  | -5.871347000 | 0.491562000  | -0.604526000 |
| H  | -4.553563000 | -0.350203000 | -1.418886000 |
| H  | -5.300780000 | 2.608221000  | -1.888566000 |
| H  | -3.986366000 | 1.732118000  | -2.702166000 |

|   |              |              |              |
|---|--------------|--------------|--------------|
| H | -5.676114000 | 1.260830000  | -2.978390000 |
| H | -4.311779000 | 0.492197000  | 2.700933000  |
| H | -5.890366000 | 0.390633000  | 1.891371000  |
| H | -5.540083000 | 1.743312000  | 2.982969000  |
| H | -3.769597000 | 2.584249000  | 1.420445000  |
| H | -5.332723000 | 2.510032000  | 0.608523000  |
| H | -0.356412000 | -4.551367000 | 1.417854000  |
| H | 0.490145000  | -5.868445000 | 0.607336000  |
| H | 1.254707000  | -5.664918000 | 2.981981000  |
| H | 2.602859000  | -5.292350000 | 1.892038000  |
| H | 1.725249000  | -3.975759000 | 2.700787000  |
| H | 2.579345000  | -3.765236000 | -1.418899000 |
| H | 2.507001000  | -5.328106000 | -0.606198000 |
| H | 0.389194000  | -5.888942000 | -1.891726000 |
| H | 0.491432000  | -4.311108000 | -2.702621000 |
| H | 1.743894000  | -5.538912000 | -2.980939000 |
| H | 4.125949000  | 1.956390000  | 1.414122000  |
| H | 4.847656000  | 3.346185000  | 0.604057000  |
| H | 2.597735000  | 3.474880000  | 2.704831000  |
| H | 3.300982000  | 4.892056000  | 1.895980000  |
| H | 4.298281000  | 3.905968000  | 2.980923000  |
| H | 1.982150000  | 4.119050000  | -1.416262000 |
| H | 3.378855000  | 4.828246000  | -0.607066000 |
| H | 4.909581000  | 3.264066000  | -1.894966000 |
| H | 3.934157000  | 4.269191000  | -2.982553000 |
| H | 3.485913000  | 2.573581000  | -2.703659000 |

**Optimized xyz coordinates for low-spin [Co<sup>III</sup>(SCN)<sub>6</sub>]<sup>3-</sup>**

|    |         |         |         |
|----|---------|---------|---------|
| Co | 0.0000  | -0.0001 | 0.0003  |
| S  | -1.2443 | 0.0307  | 2.0375  |
| S  | -1.2430 | 1.7503  | -1.0446 |
| S  | 1.2458  | 1.7785  | 0.9931  |
| S  | 1.2448  | -0.0305 | -2.0366 |
| S  | 1.2440  | -1.7502 | 1.0449  |
| S  | -1.2460 | -1.7781 | -0.9920 |
| C  | -2.3094 | -1.2661 | 2.2435  |
| C  | 2.3084  | 1.2674  | -2.2431 |
| C  | -2.3106 | -1.3065 | -2.2179 |
| C  | 2.3130  | 1.3070  | 2.2167  |
| N  | -3.0748 | -2.1130 | 2.5222  |
| N  | -3.0760 | -1.1234 | -3.0906 |
| N  | 3.0730  | 2.1150  | -2.5219 |
| N  | 3.0800  | 1.1236  | 3.0878  |
| C  | -2.3023 | 2.5827  | -0.0229 |
| C  | 2.3001  | -2.5848 | 0.0217  |
| N  | -3.0638 | 3.2509  | 0.5724  |
| N  | 3.0595  | -3.2547 | -0.5745 |

**Optimized xyz coordinates for low-spin  $[\text{Co}^{\text{III}}\text{Cl}_6]^{3-}$**

|    |         |         |         |
|----|---------|---------|---------|
| Co | 0.0003  | 0.0001  | -0.0004 |
| Cl | -0.0653 | -2.2019 | -0.9350 |
| Cl | 1.8702  | -0.6319 | 1.3553  |
| Cl | 0.0657  | 2.2024  | 0.9355  |
| Cl | 1.4960  | 0.6930  | -1.7347 |
| Cl | -1.4970 | -0.6935 | 1.7358  |
| Cl | -1.8701 | 0.6318  | -1.3562 |

## References:

- (1) Girolami, G.; Rauchfuss, T. B.; Angelici, R. J. *Synthesis and Technique in Inorganic Chemistry: A Laboratory Manual*, 3<sup>rd</sup> Ed.; University Science Books: Sausa, 1999.
- (2) Schlessinger, G. G. In *Inorg. Synth.*; 1967; Vol. 9, pp 160–163.
- (3) Schlessinger, G. G.; Simmons, J. W.; Jabs, G.; Chamberlain, M. M. In *Inorg. Synth.*; 1960; Vol. 6, pp 173–175.
- (4) Wang, K.; Jordan, R. B. Electron Transfer Kinetics of Cobaloxime. *Can. J. Chem.* **1996**, *665*, 658–665.
- (5) Trogler, W.; Stewart, R. C.; Epps, L. A.; Marzilli, L. G. *Cis* and *Trans* Effects on the Proton Magnetic Resonance Spectra of Cobaloxime. *Inorg. Chem.* **1974**, *13* (7), 1564–1570.
- (6) Follett, A. D.; McNeill, K. Evidence for the Formation of a *Cis*-Dichlorovinyl Anion upon Reduction of *Cis*-1,2-Dichlorovinyl(pyridine)cobaloxime. *Inorg. Chem.* **2006**, *45* (6), 2727–2732.
